# Supplementary material for: Synthesis, combined theoretical and spectral characterization of some new 1,3,5 triazine compounds, and their in vitro biological analysis
Source: Royal Society of Chemistry journal article supplement (doi:10.1039/d2re00389a), 2022-11-24
Supplement: d2re00389a1.pdf [file d2re00389a1.pdf]

## Supplementary data

All  $^1\text{H-NMR}$  spectra used dimethyl sulfoxide (DMSO- $d_6$ ) as solvent and tetramethylsilane (TMS) as internal standard. Solvent peak was at 2.5ppm and water peak was at 3.35ppm.

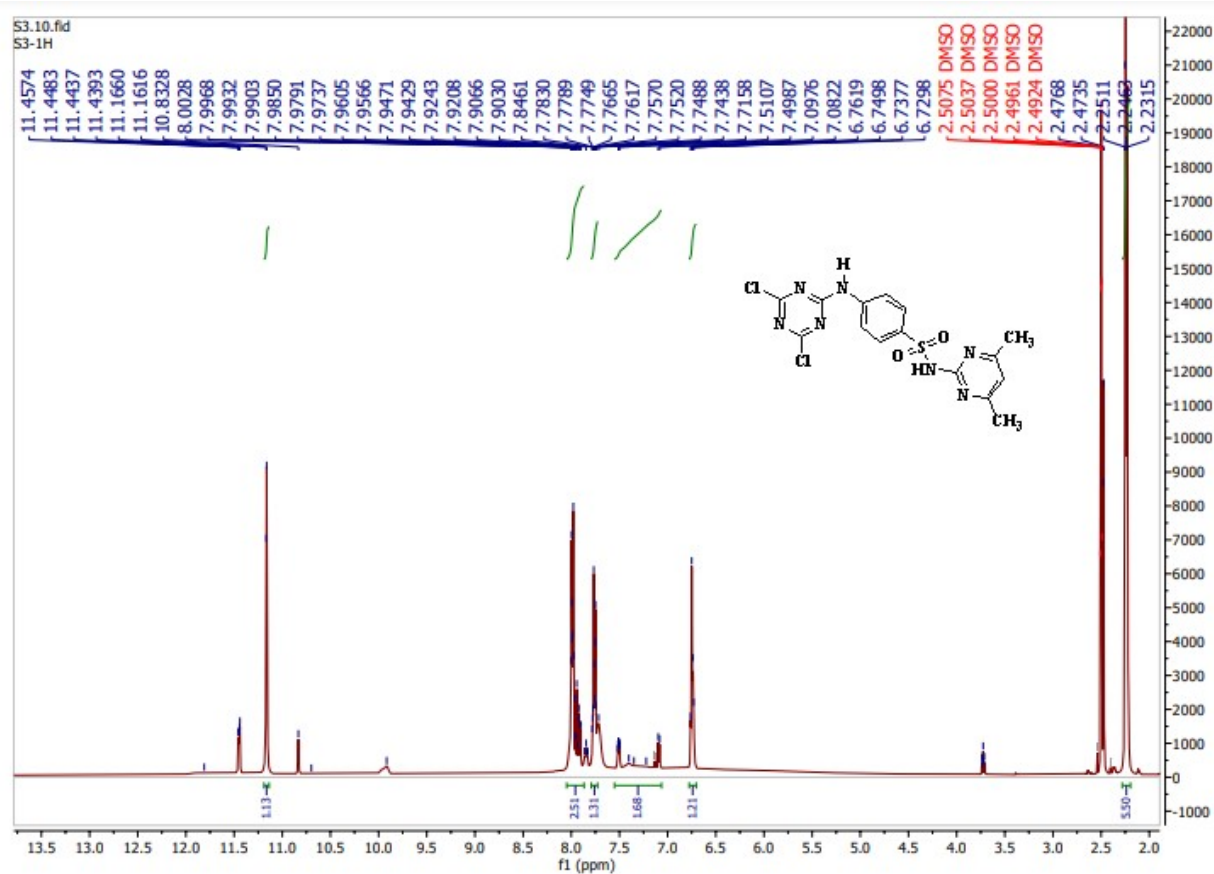

Figure 1  $^1\text{H-NMR}$  spectrum of compound-1a

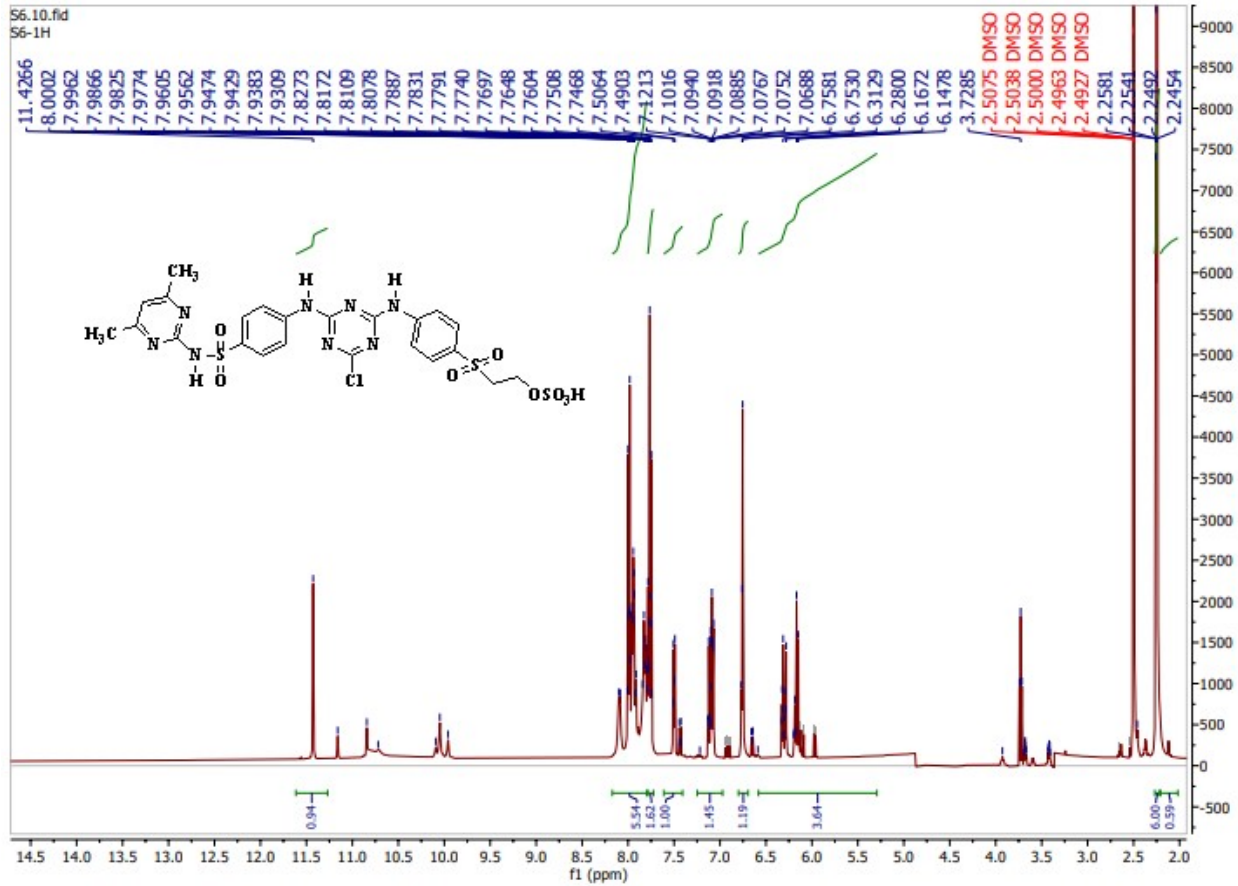

Figure 2 <sup>1</sup>H-NMR spectrum of compound-2a

All  $^{13}\text{C}$ -NMR spectra used dimethyl sulfoxide (DMSO- $d_6$ ) as solvent. Solvent peak was at 40ppm.

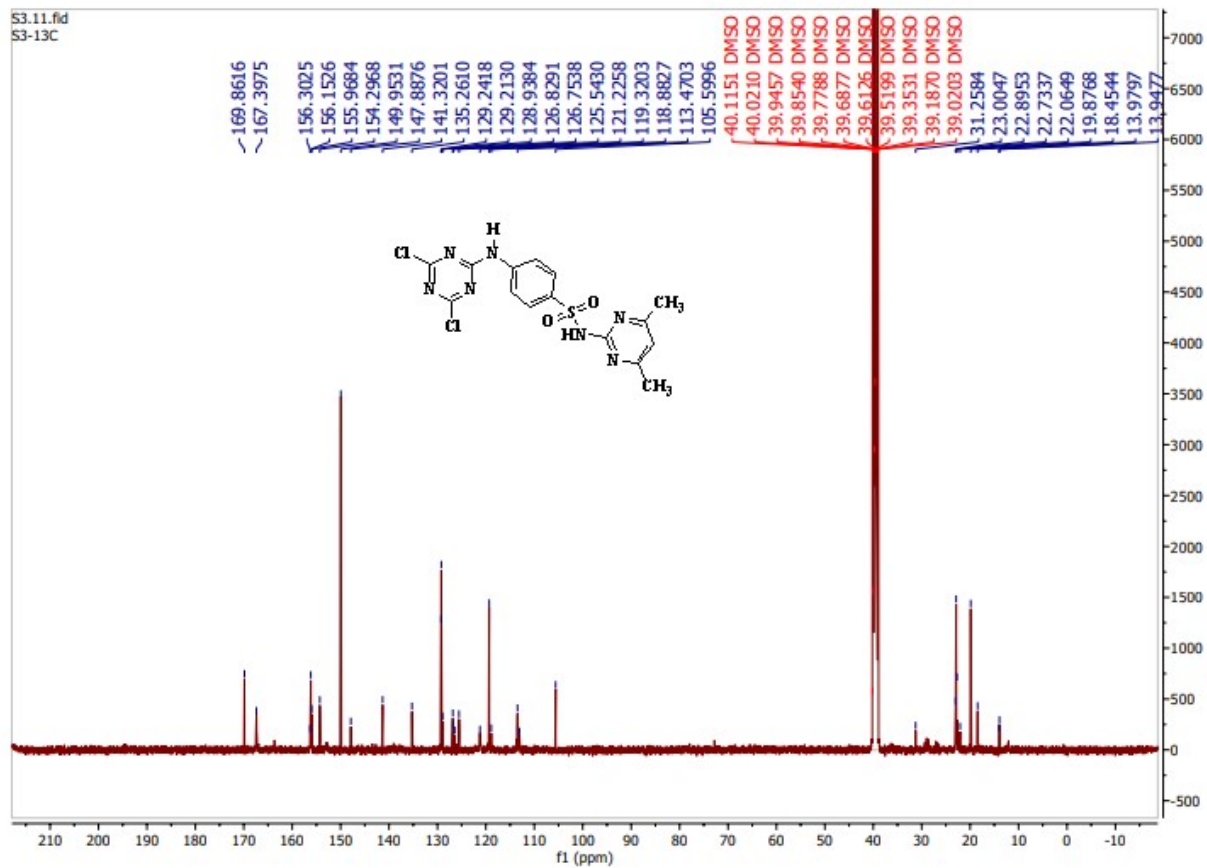

Figure 3  $^{13}\text{C}$ -NMR spectrum of compound-1a

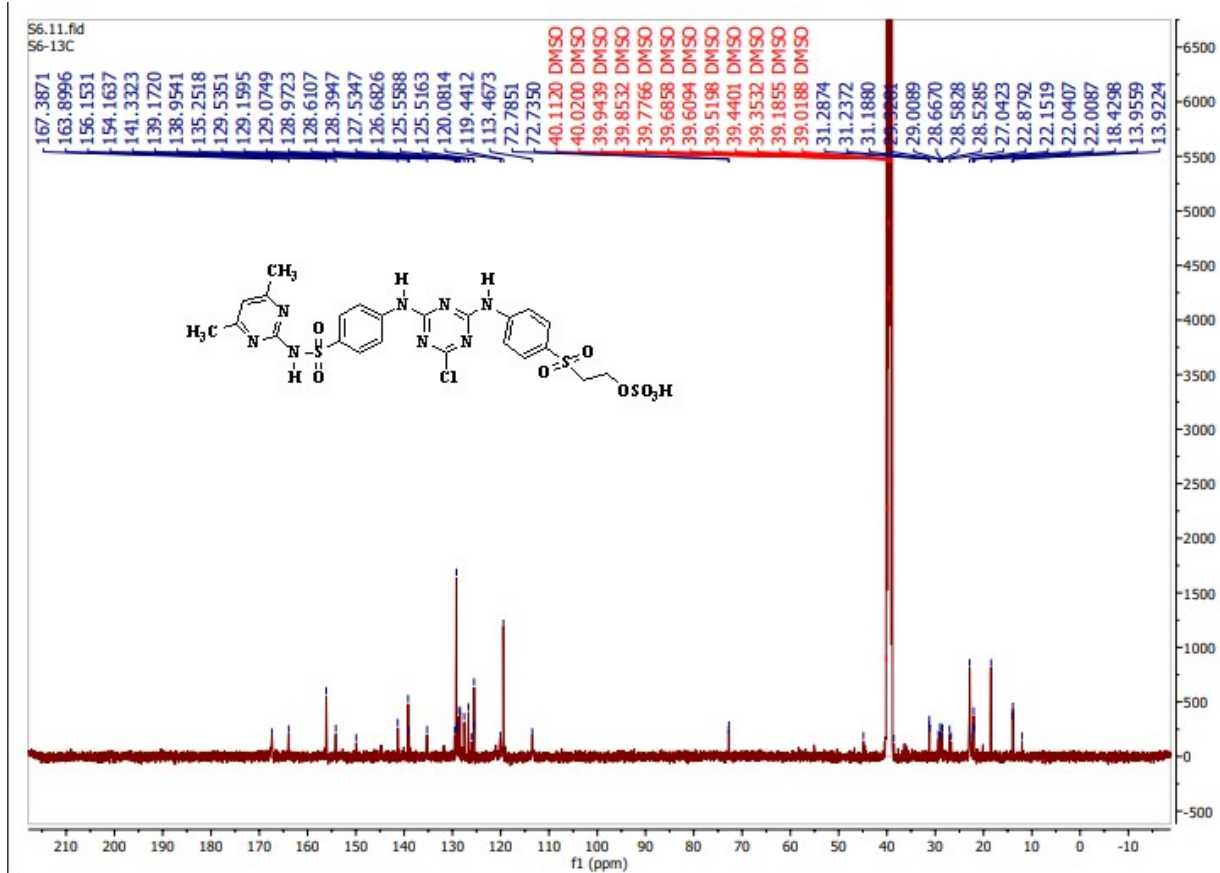

Figure 4  $^{13}\text{C}$ -NMR spectrum of compound-2a

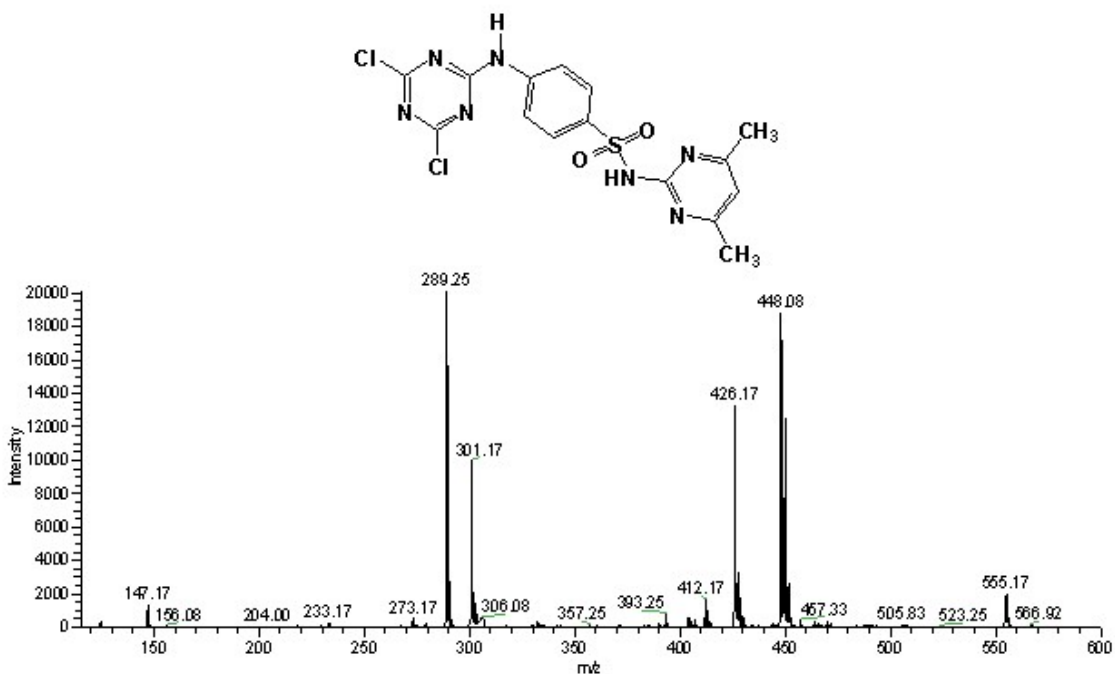

**Figure 5** Mass spectrum of Compound-1a (Positive mode)

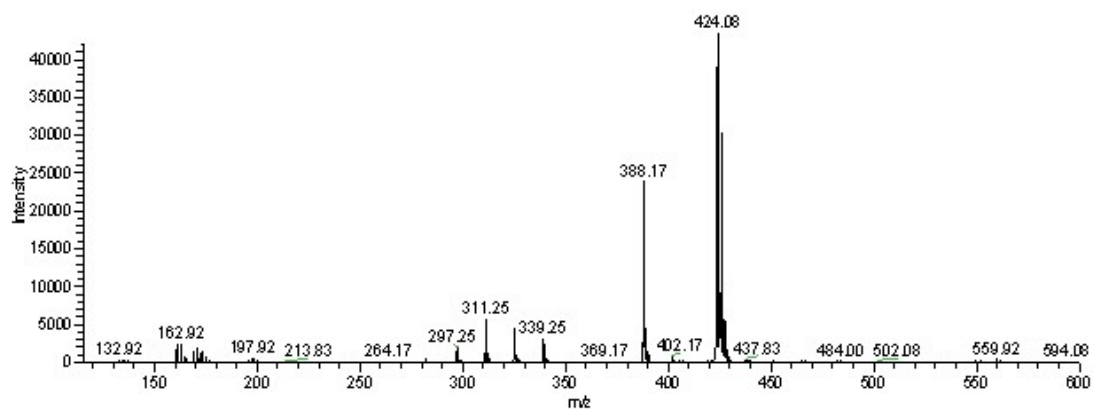

**Figure 6** Mass spectrum of Compound-1a (Negative mode)

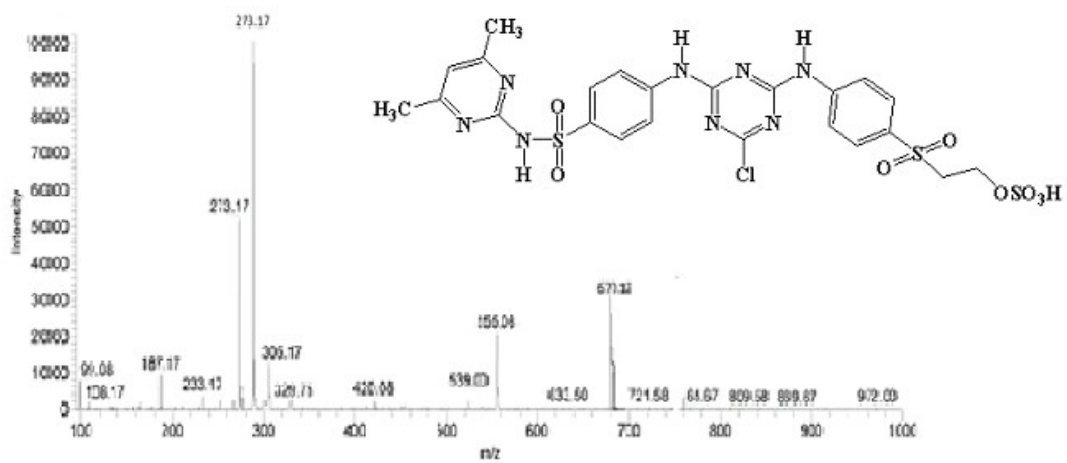

Figure 7 Mass spectrum of Compound-2a
